# Supplementary material for: Responsive Alternative Splicing Events of Opisthopappus Species against Salt Stress
Source: MDPI journal article supplement (doi:10.3390/ijms25021227), 2024-01-19
Supplement: s1 [file s1]

## Supplementary Materials

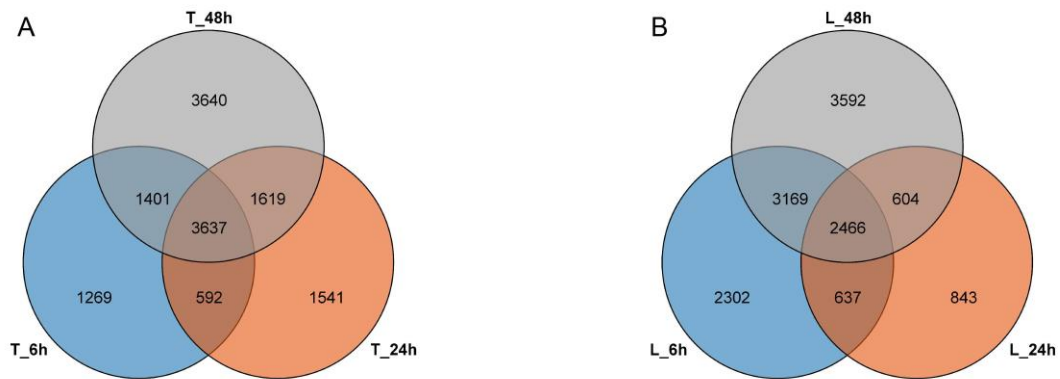

**Figure S1.** Venn diagram analysis showing DEGs under different time treatments. (A) DEGs of *O. taihangensis*. (B) DEGs of *O. longilobus*.

**Note:** T: *O. taihangensis*. L: *O. longilobus*.

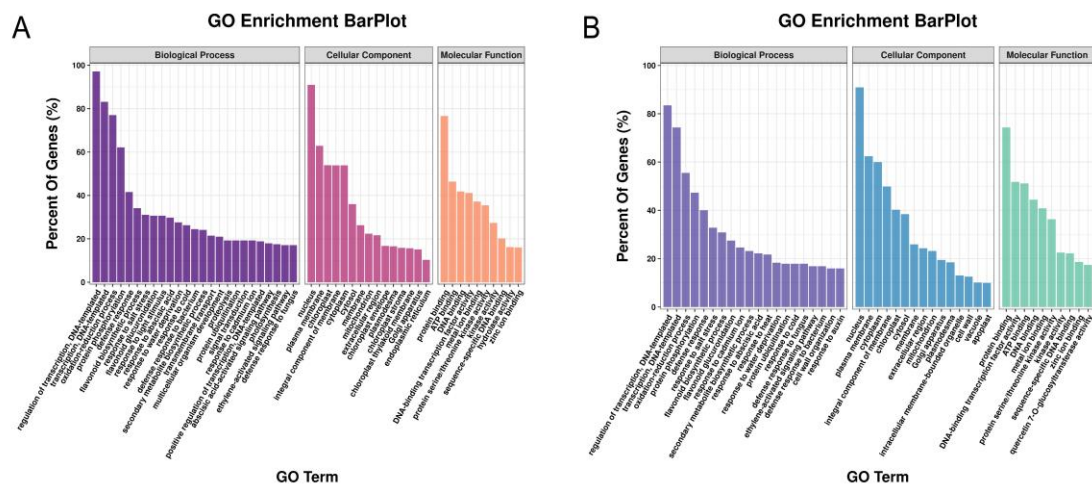

**Figure S2.** GO enrichment analysis of shared DEGs under time gradients. (A) GO enrichment analysis of *O. taihangensis*. (B) GO enrichment analysis of *O. longilobus*.

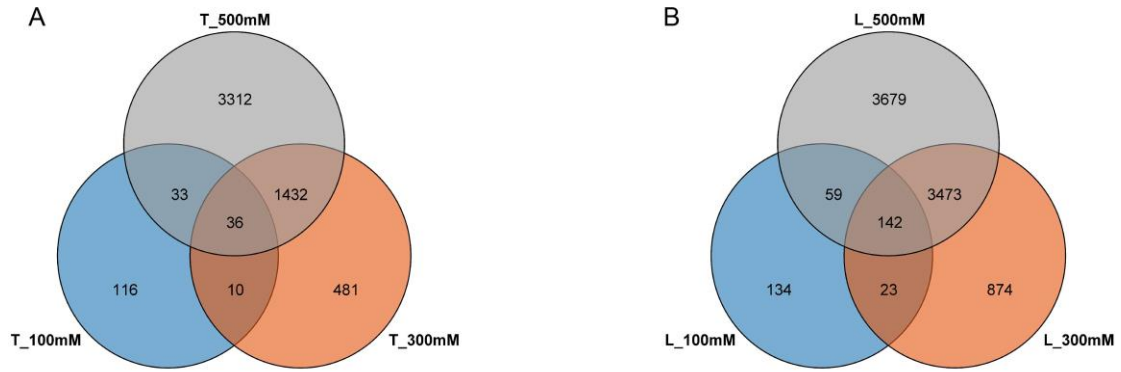

**Figure S3.** Venn diagram analysis showing DEGs under different concentration gradients. (A)

DEGs of *O. taihangensis*. (B) DEGs of *O. longilobus*.

**Note:** T: *O. taihangensis*. L: *O. longilobus*.

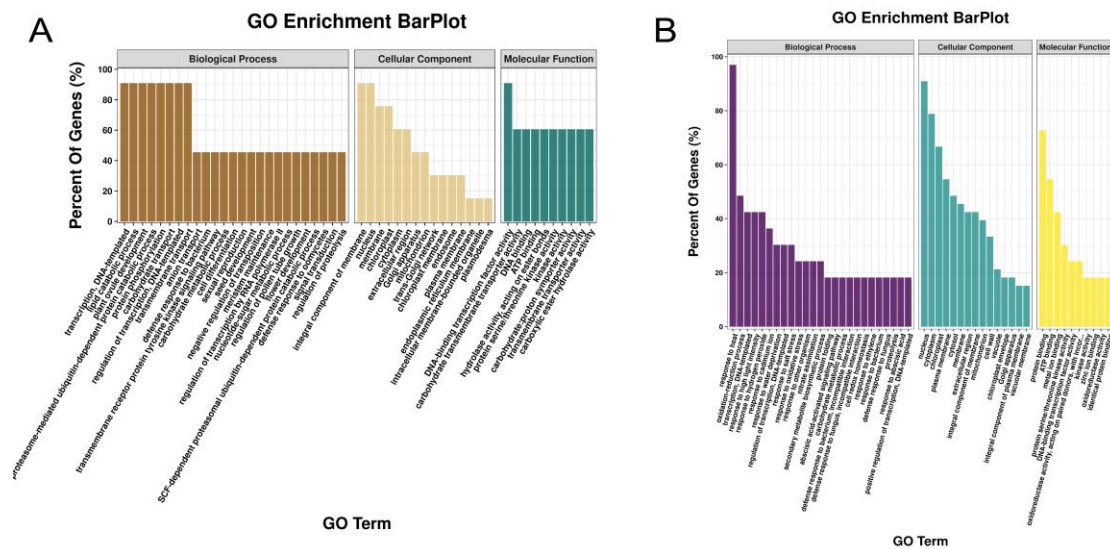

**Figure S4.** GO enrichment analysis of shared DEGs under concentration gradients. (A) GO

enrichment analysis of *O. taihangensis*. (B) GO enrichment analysis of *O. longilobus*.

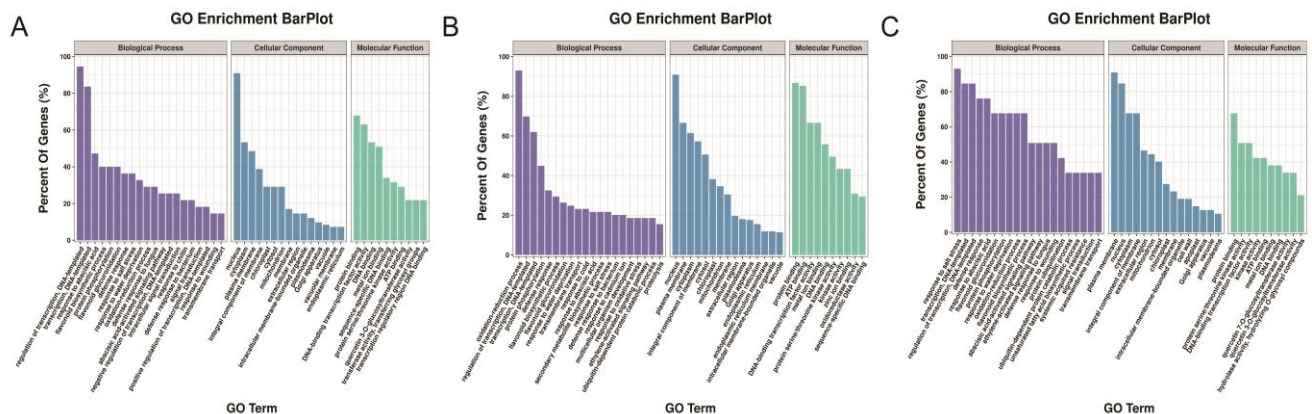



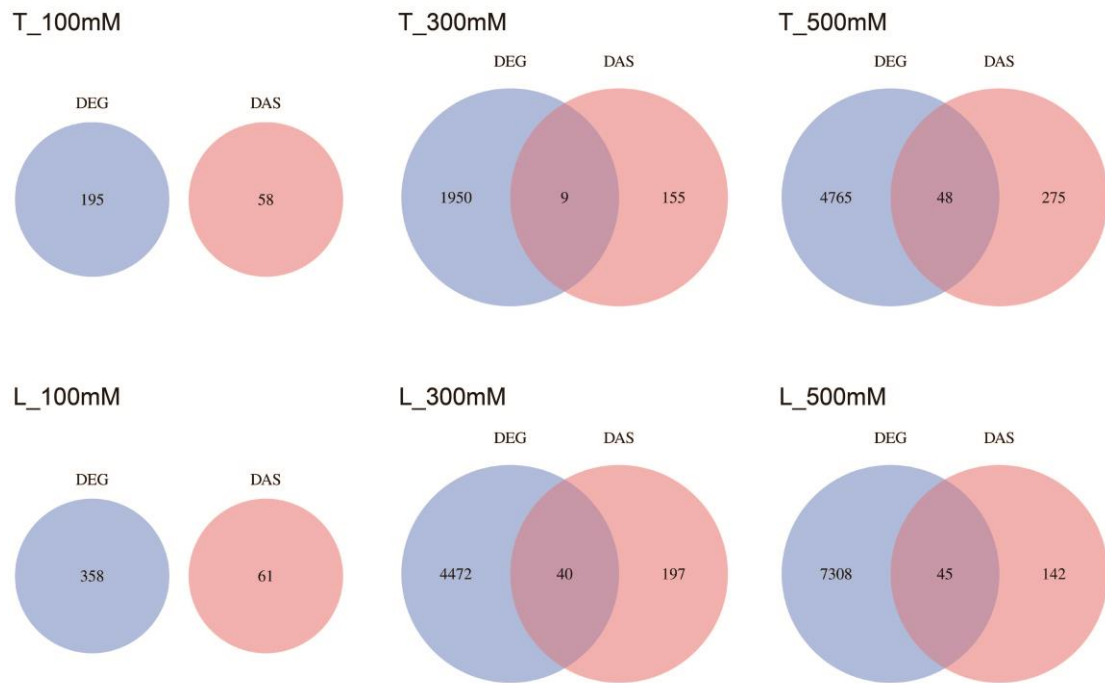

**Figure S8.** Venn diagram analysis showing overlaps between DEG and DAS under concentration gradients.

**Note:** T: *O. taihangensis*. L: *O. longilobus*.

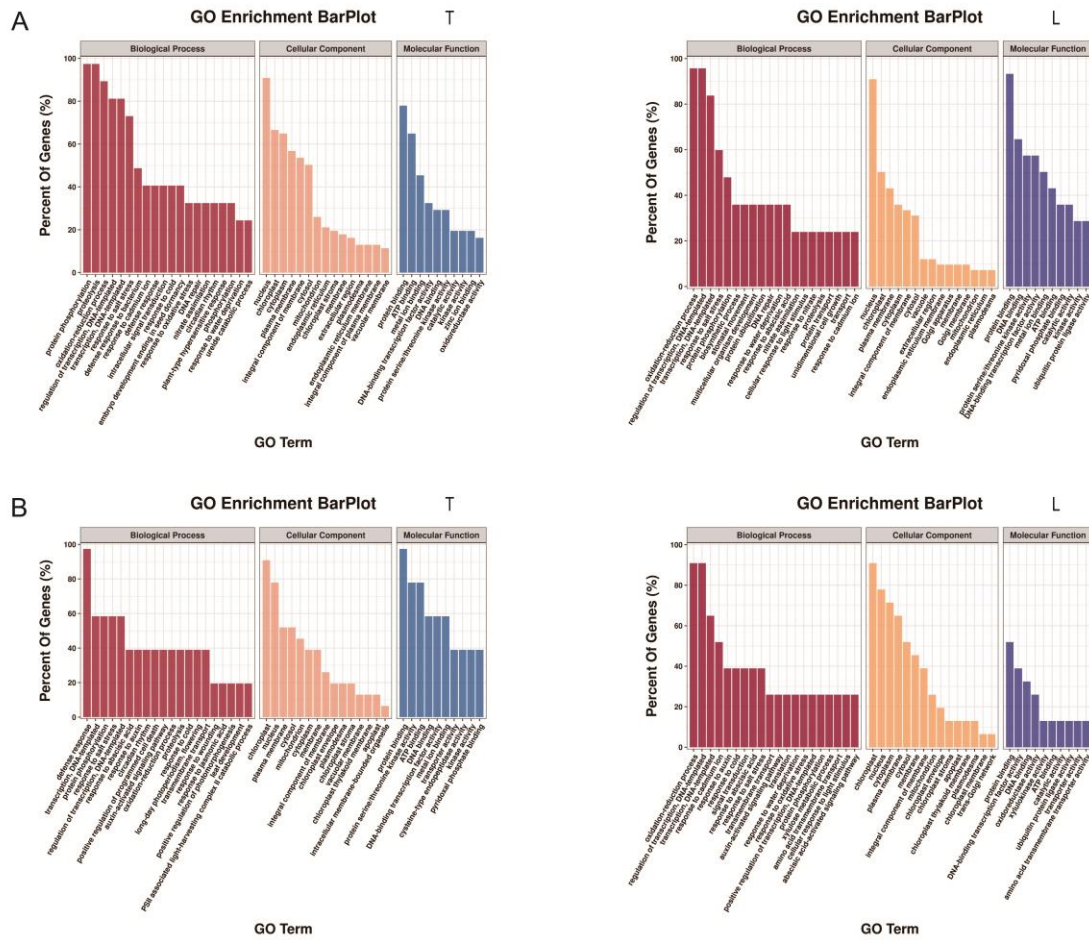

**Figure S9.** GO enrichment analysis of overlapped genes. (A) GO enrichment analysis of overlapped genes under time gradients. (B) GO enrichment analysis of overlapped genes under concentration gradients.

**Note:** T: *O. taihangensis*. L: *O. longilobus*.



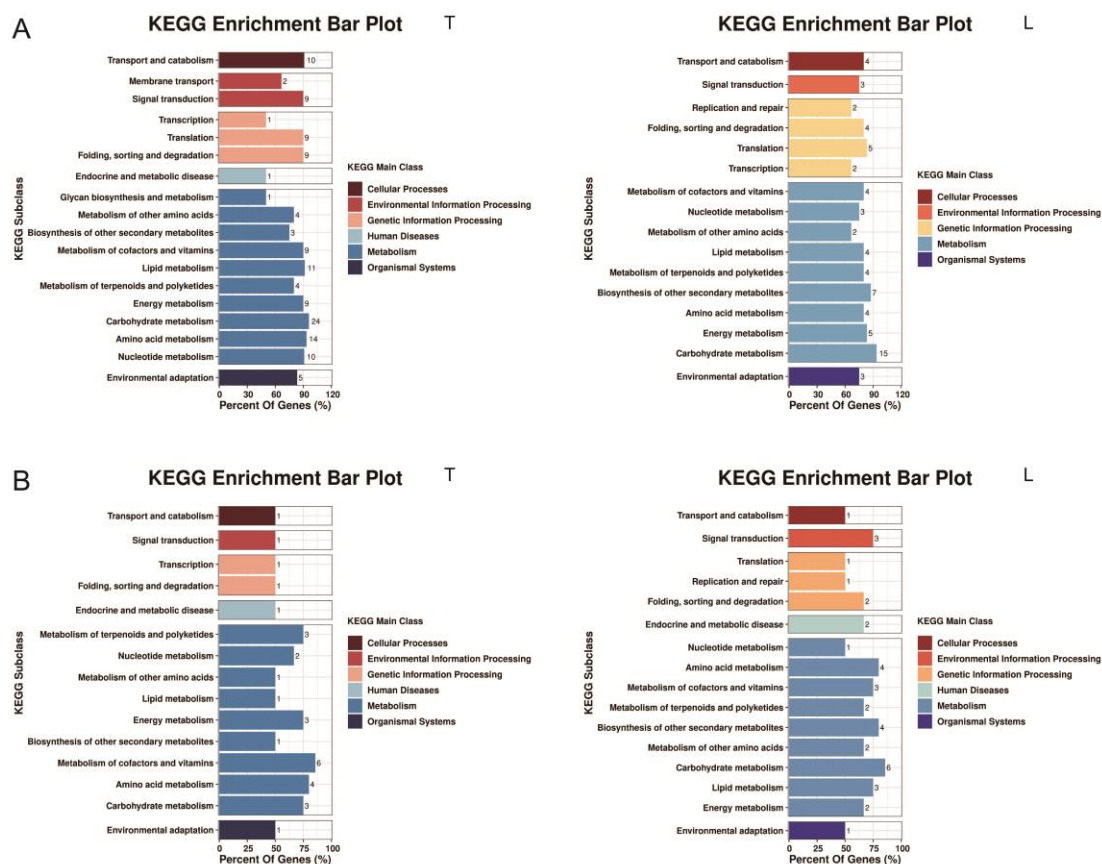

**Figure S10.** KEGG enrichment analysis of overlapped genes. (A) KEGG enrichment analysis of overlapped genes under time gradients. (B) KEGG enrichment analysis of overlapped genes under concentration gradients.

**Note:** T: *O. taihangensis*. L: *O. longilobus*.

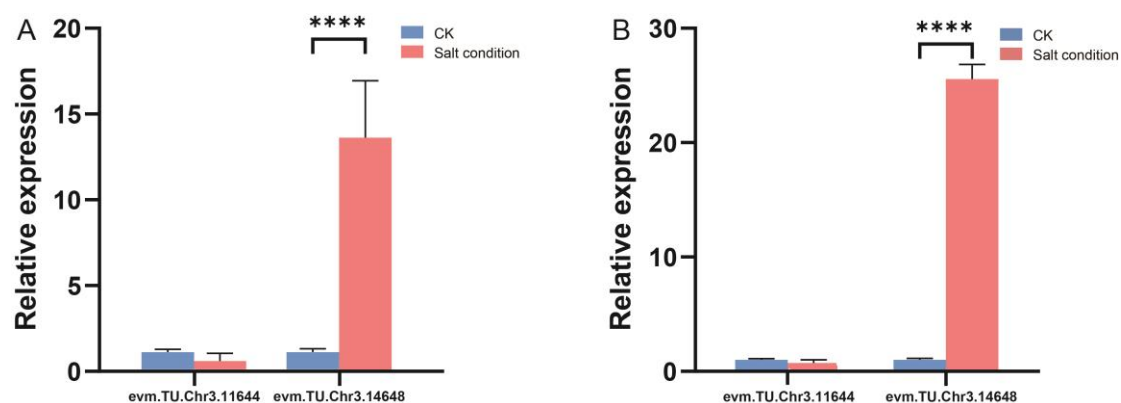

**Figure S11.** Experimental validation for DAS events under time gradients. (A) qRT-PCR analysis of *O. taihangensis*. (B) qRT-PCR analysis of *O. longilobus*.

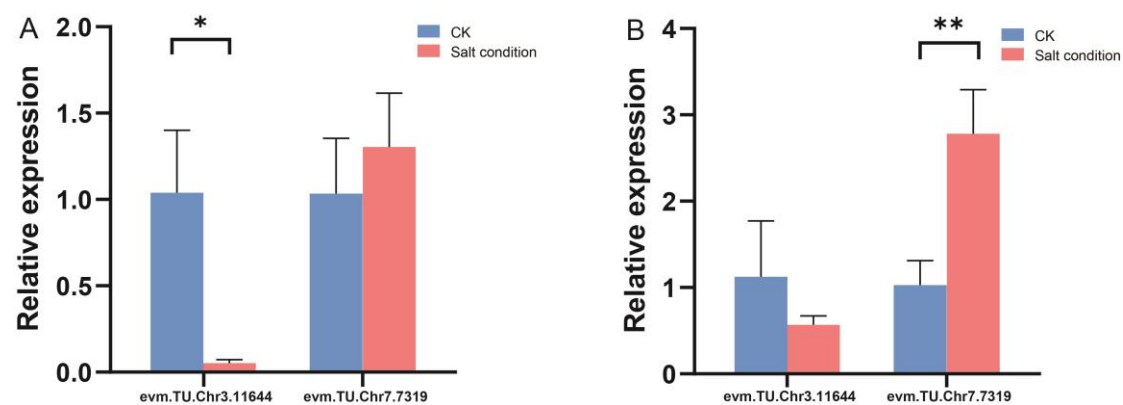

**Figure S12.** Experimental validation for DAS events under concentration gradients. (A) qRT-PCR analysis of *O. taihangensis*. (B) qRT-PCR analysis of *O. longilobus*.

**Table S1.** Primers for qRT-PCR validation.

| Gene ID                          | Primers (5'-3')                                         |
|----------------------------------|---------------------------------------------------------|
| <i>evm.TU.Chr3.11644</i>         | F: TCATTCTCAGAGCCTCACAAGC<br>R: TGGCACTAGAACCAACCATAACC |
| <i>evm.TU.Chr3.14648</i>         | F: ATGCTCGTCTTCAGGTTCTCA<br>R: CCAAGGACACTGTTGTGATTCT   |
| <i>evm.TU.Chr7.7319</i>          | F: AGCGGTATCAGTCCTTAGATGG<br>R: CTGCGGTCTTCGTTCTATGT    |
| <i>evm.TU.Chr8.13443</i> (Actin) | F: CCTACAACGCCACACTCTCA<br>R: ACAGCAAGTTACACCACTCATG    |

**Table S2.** DEGs under different salt treatments

| Sample  | Number of DEGs | Up   | Down |
|---------|----------------|------|------|
| T_6h    | 6899           | 3986 | 2913 |
| T_24h   | 7389           | 4174 | 3215 |
| T_48h   | 10297          | 5504 | 4793 |
| L_6h    | 8574           | 4483 | 4091 |
| L_24h   | 4550           | 2764 | 1786 |
| L_48h   | 9831           | 5425 | 4406 |
| T_100mM | 195            | 77   | 118  |
| T_300mM | 1959           | 1127 | 832  |
| T_500mM | 4813           | 2593 | 2220 |
| L_100mM | 358            | 189  | 169  |

|         |      |      |      |
|---------|------|------|------|
| L_300mM | 4512 | 2333 | 2179 |
| L_500mM | 7353 | 3767 | 3586 |

**Note:** T: *O. taihangensis*. L: *O. longilobus*.

**Table S3.** Statistics on the number of AS events

| Sample  | Number of AS events | SE   | MXE |
|---------|---------------------|------|-----|
| T_6h    | 4721                | 4555 | 166 |
| T_24h   | 4831                | 4647 | 184 |
| T_48h   | 4324                | 4180 | 144 |
| L_6h    | 5271                | 5060 | 211 |
| L_24h   | 5387                | 5148 | 239 |
| L_48h   | 4428                | 4274 | 154 |
| T_100mM | 4294                | 4122 | 172 |
| T_300mM | 5154                | 4945 | 209 |
| T_500mM | 6660                | 6366 | 294 |
| L_100mM | 3941                | 3796 | 145 |
| L_300mM | 5495                | 5262 | 233 |
| L_500mM | 5311                | 5089 | 222 |

**Note:** T: *O. taihangensis*. L: *O. longilobus*.

**Table S4.** Statistics on the number of DAS events

| Sample  | Number of DAS events | SE  | MXE |
|---------|----------------------|-----|-----|
| T_6h    | 180                  | 173 | 7   |
| T_24h   | 198                  | 194 | 4   |
| T_48h   | 552                  | 529 | 23  |
| L_6h    | 175                  | 173 | 2   |
| L_24h   | 162                  | 156 | 6   |
| L_48h   | 258                  | 242 | 16  |
| T_100mM | 60                   | 57  | 3   |
| T_300mM | 172                  | 163 | 9   |



|         |     |     |    |
|---------|-----|-----|----|
| T_500mM | 334 | 324 | 10 |
| L_100mM | 62  | 62  | 0  |
| L_300mM | 242 | 241 | 1  |
| L_500mM | 190 | 182 | 8  |

---

**Note:** T: *O. taihangensis*. L: *O. longilobus*.
